# Supplementary material for: Bond states, moiré patterns, and bandgap modulation of two-dimensional BN/SiC van der Waals heterostructures
Source: Royal Society of Chemistry journal article supplement (doi:10.1039/d0ma00258e), 2020-01-01

## Supplementary Information

Title: Bond states, moiré pattern and bandgap modulation of two-dimensional BN/SiC van der Waals heterostructures

Authors: Maolin Bo \*, Hanze Li, Anlin Deng, Lei Li, Chuang Yao , Zhongkai Huang ,Cheng Peng\*

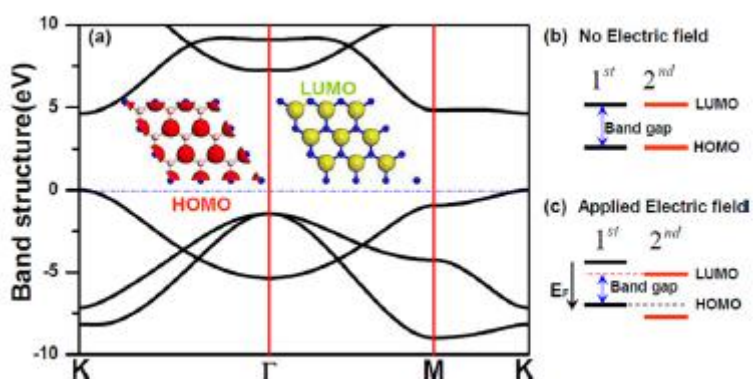

TABLE I. The binding energy  $E_b$ , energy difference  $E_{diff}$ , BN spacing  $d$ , and band gap of different stacking BN bilayers.

| Stacking | $E_b$ (meV) | $E_{diff}$ (meV) | $d$ (Å) | Band gap (eV) |
|----------|-------------|------------------|---------|---------------|
| AB       | -84         | 0                | 3.203   | 4.44          |
| AA'      | -82         | 2                | 3.253   | 4.41          |
| AB'      | -73         | 11               | 3.206   | 3.97          |
| AB''     | -52         | 32               | 3.434   | 4.03          |
| AA       | -45         | 39               | 3.497   | 3.97          |

1. The band gaps of BN calculated by Y. R. Tang and J. X. Cao, as is shown in the Fig.1. We calculated band gap(HSE06) of BN is 4.6 eV. The formation energy calculated by Y. R. Tang and J. X. Cao, as is shown in theTable1. We calculated formation energy of BN is 60 meV. (Ref: Y.R. Tang, Y. Zhang, J.X. Cao, J. Appl. Phys., 119 (2016) 195303.)

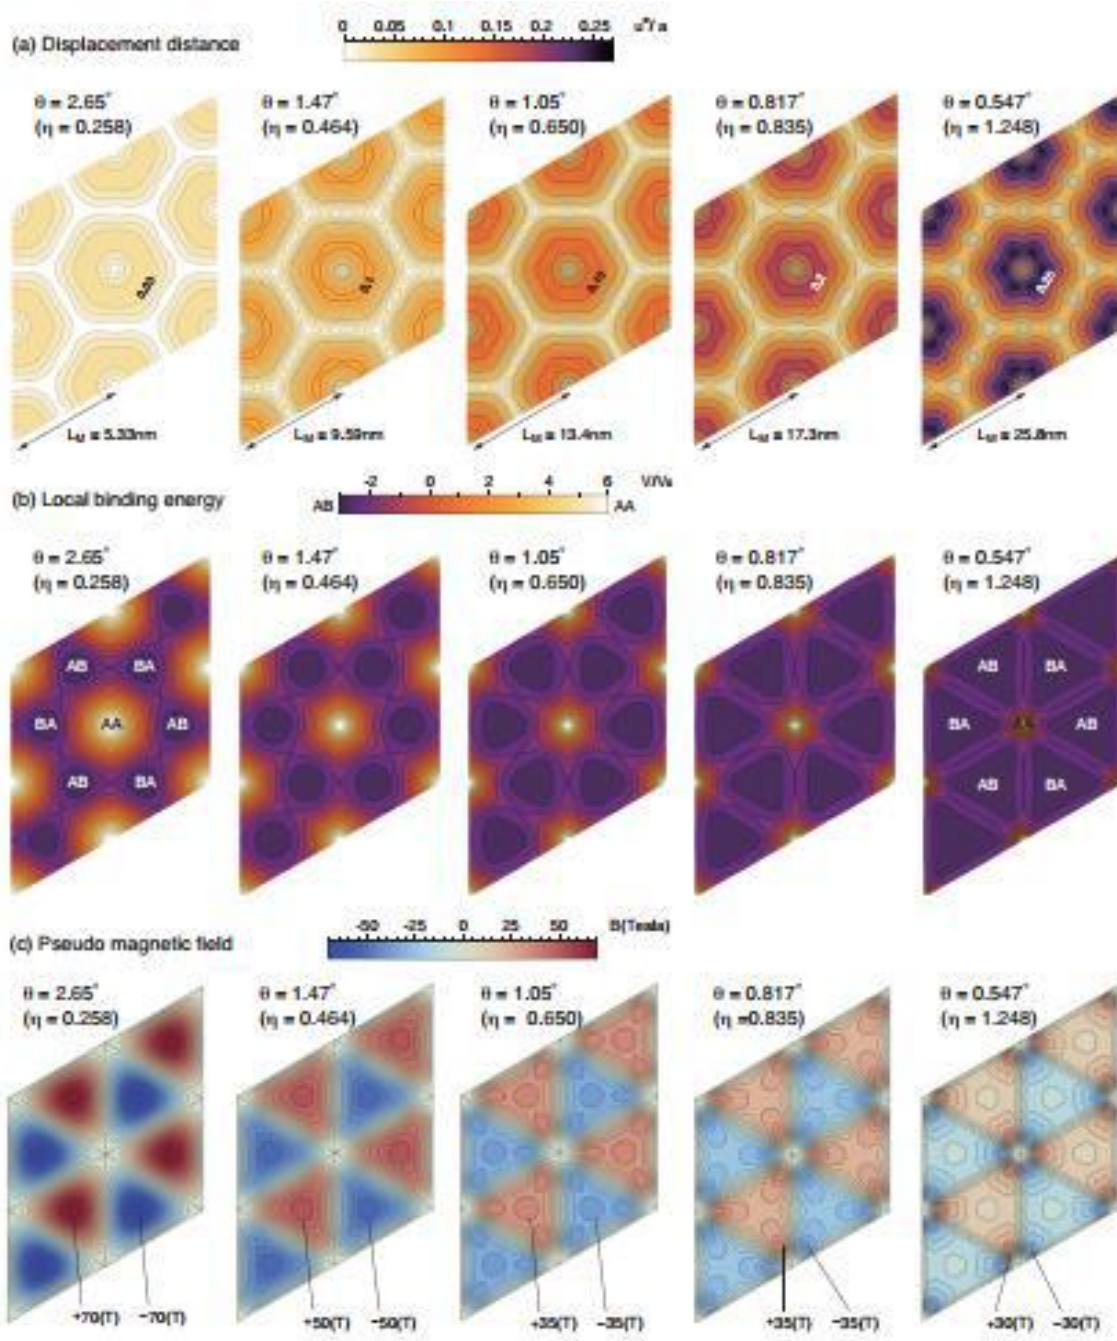

- Two-dimensional maps for (a) absolute value of the displacement vector  $u(r)$ , (b) the local binding energy  $V [\delta(r)]$ , and (c) strain-induced pseudo magnetic field  $B_{\text{eff}}(r)$ , calculated for Twisted bilayer graphene with various rotation angles. (Ref: Nam N N T, Koshino M. Lattice relaxation and energy band modulation in twisted bilayer graphene[J]. Physical Review B, 2017, 96(7): 075311.)

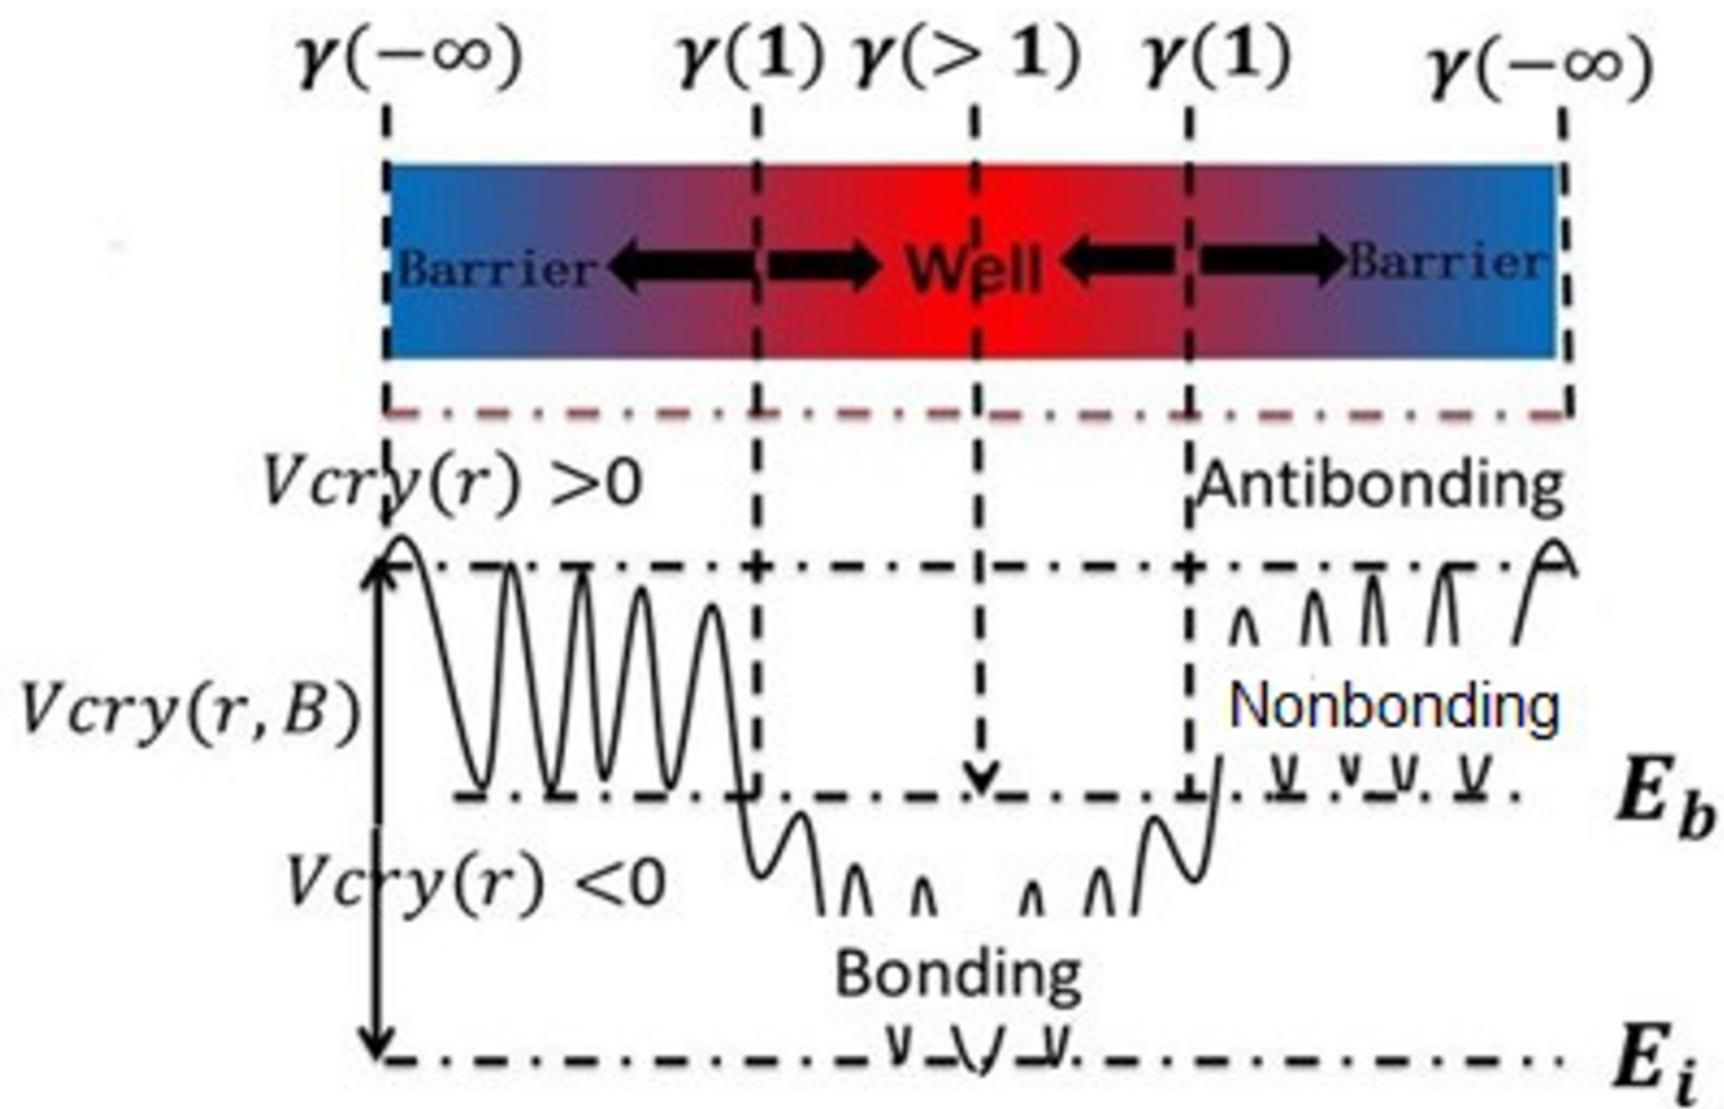

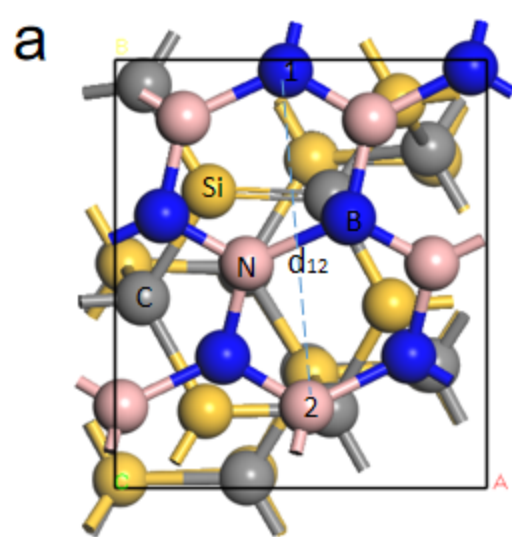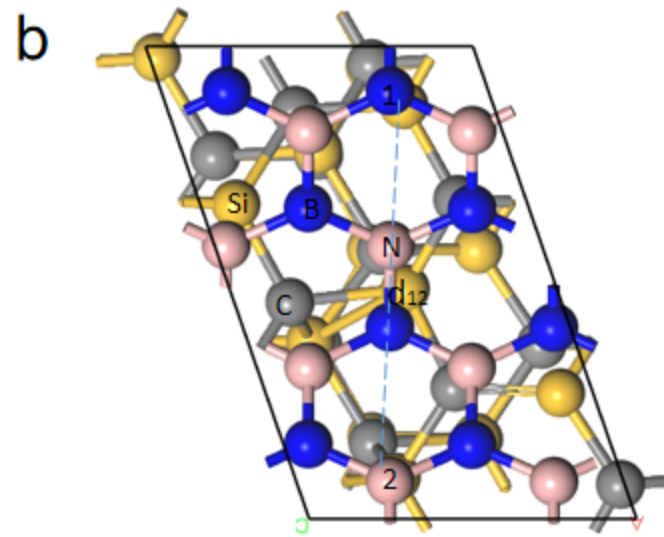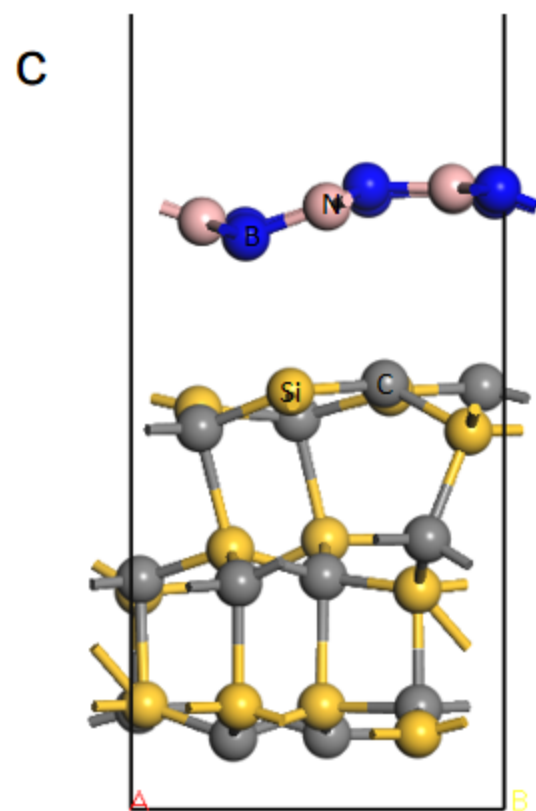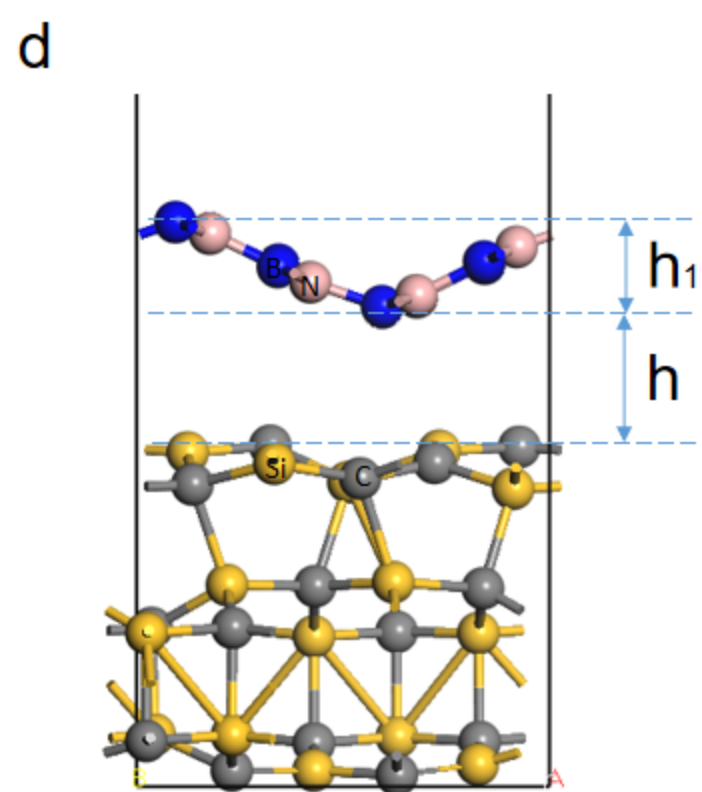

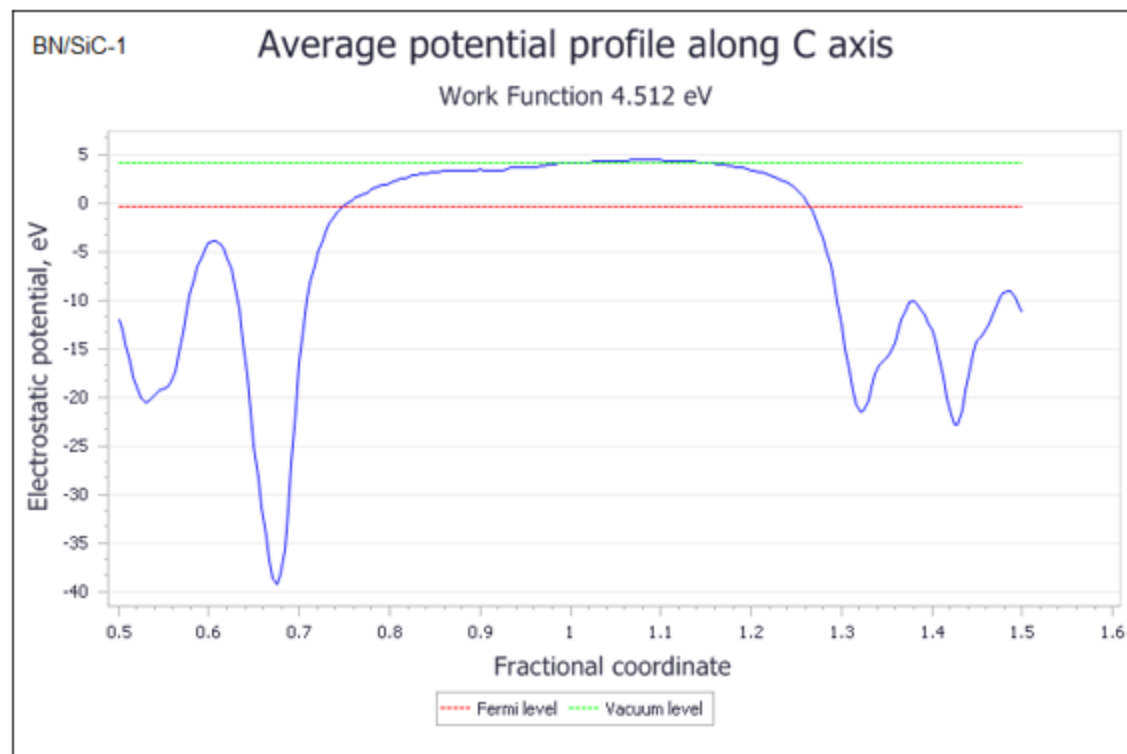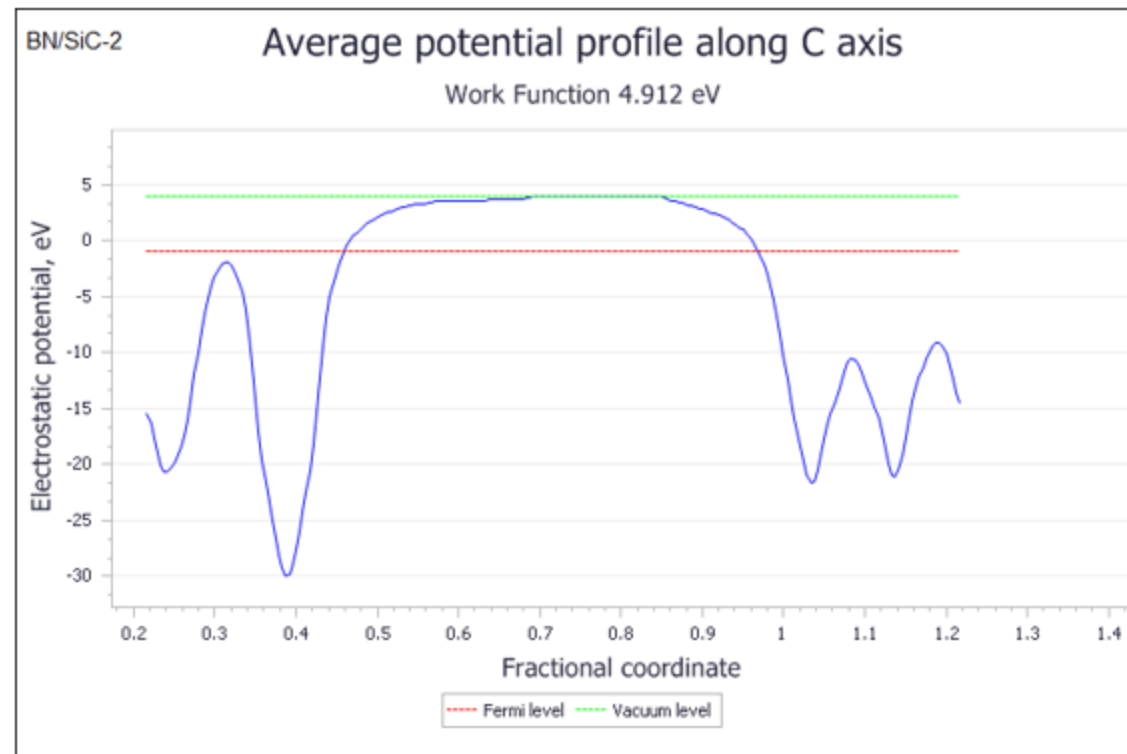



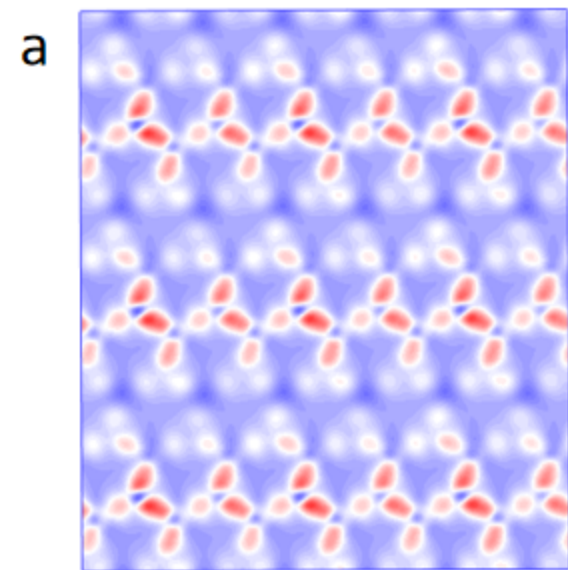

$\theta = 0^\circ$

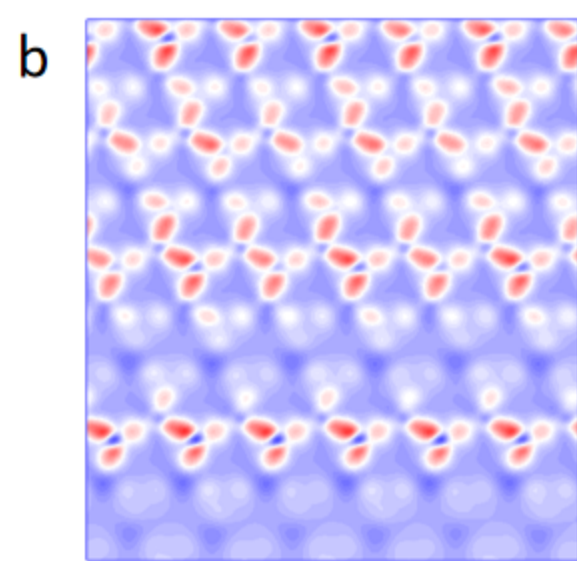

$\theta = 2^\circ$

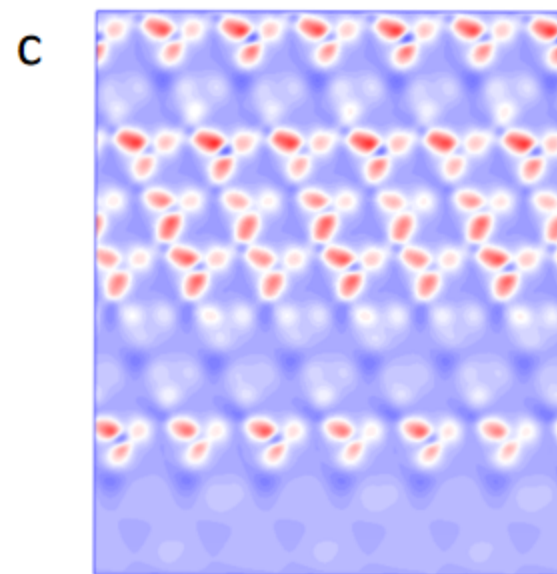

$\theta = 4^\circ$

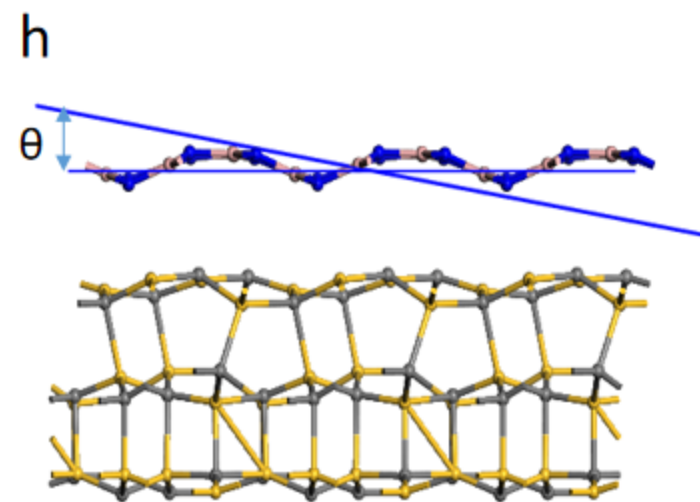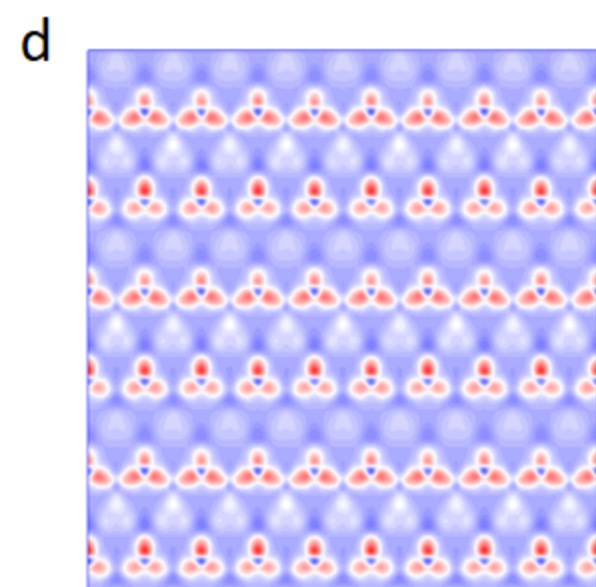

$\theta = 0^\circ$

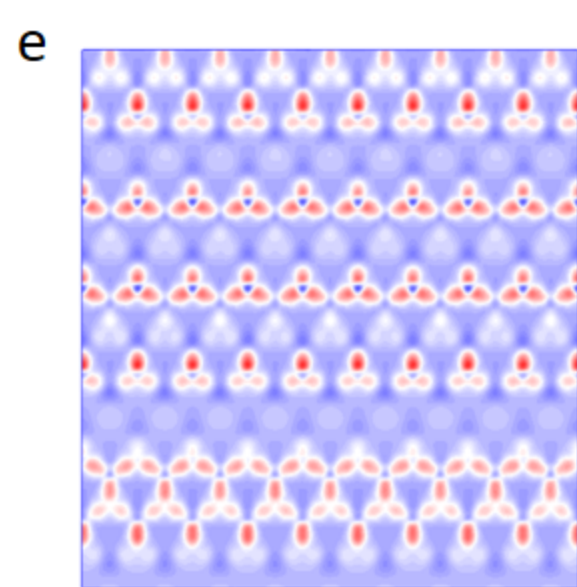

$\theta = 2^\circ$

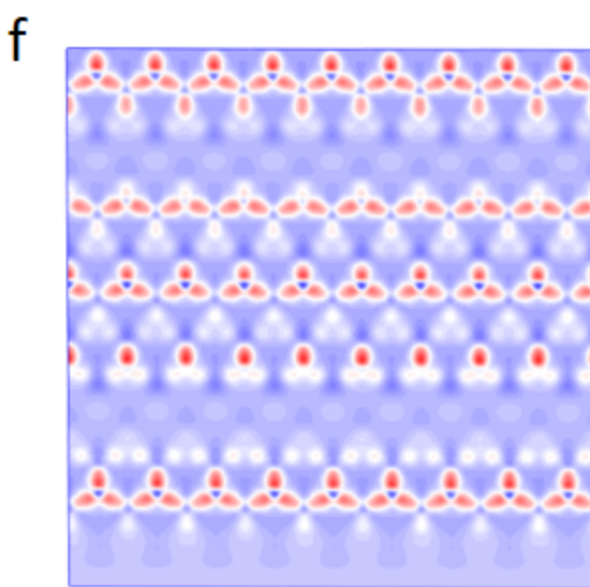

$\theta = 4^\circ$

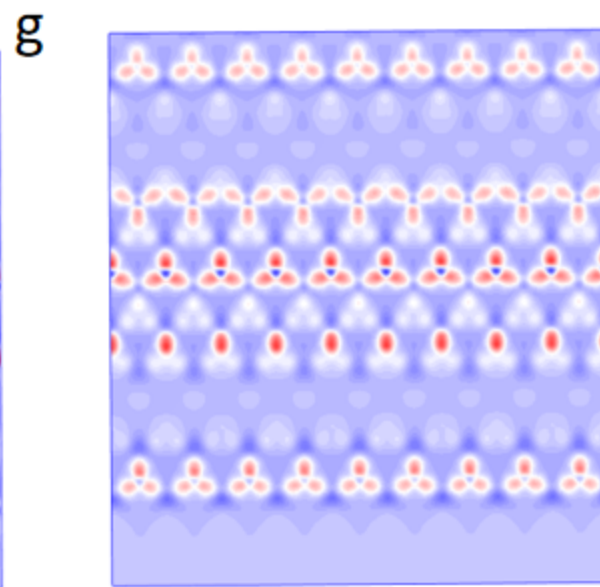

$\theta = 6^\circ$

a

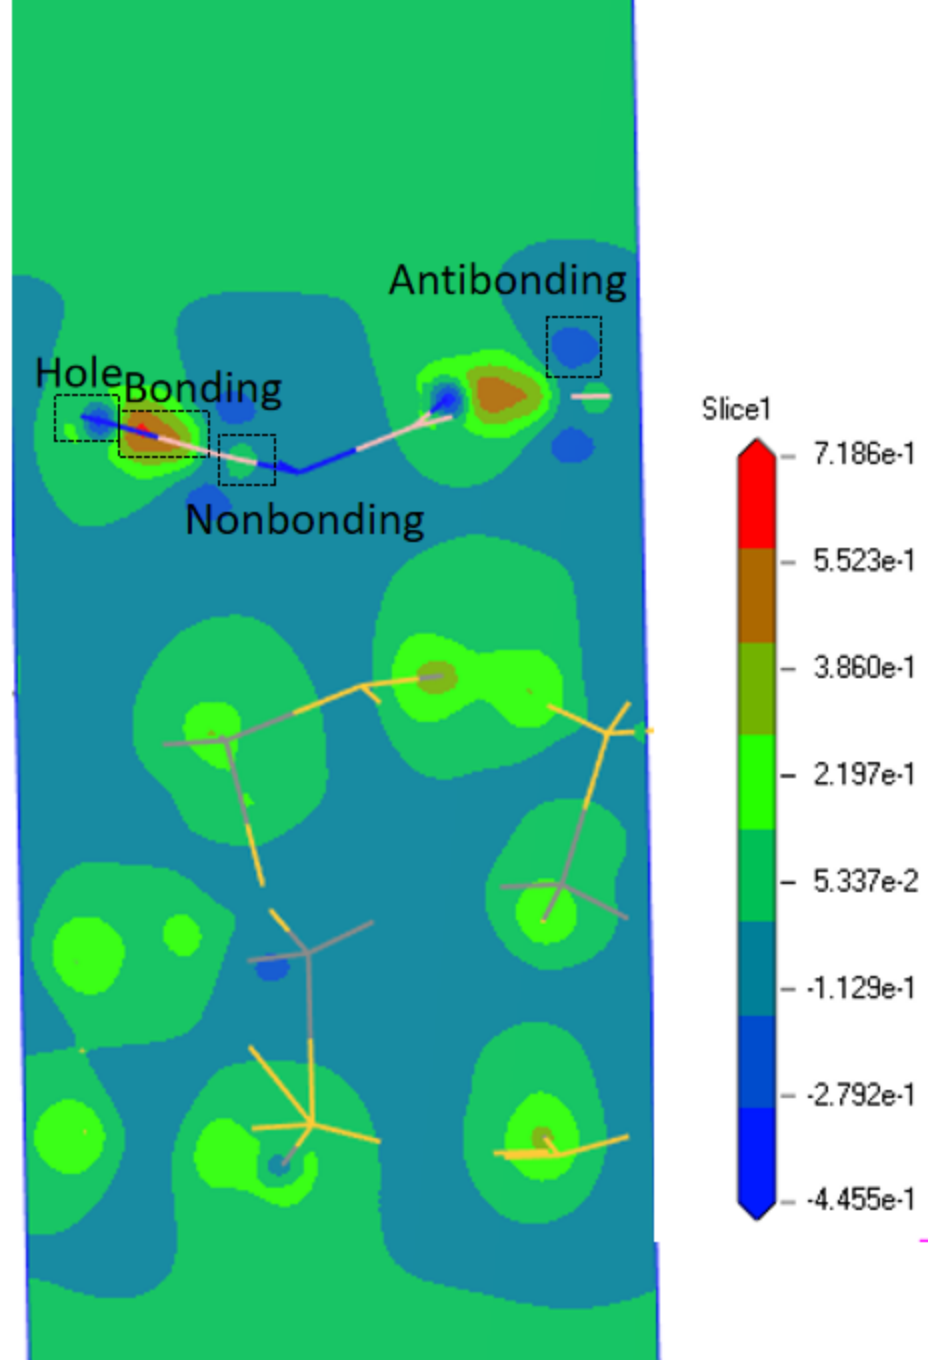

b

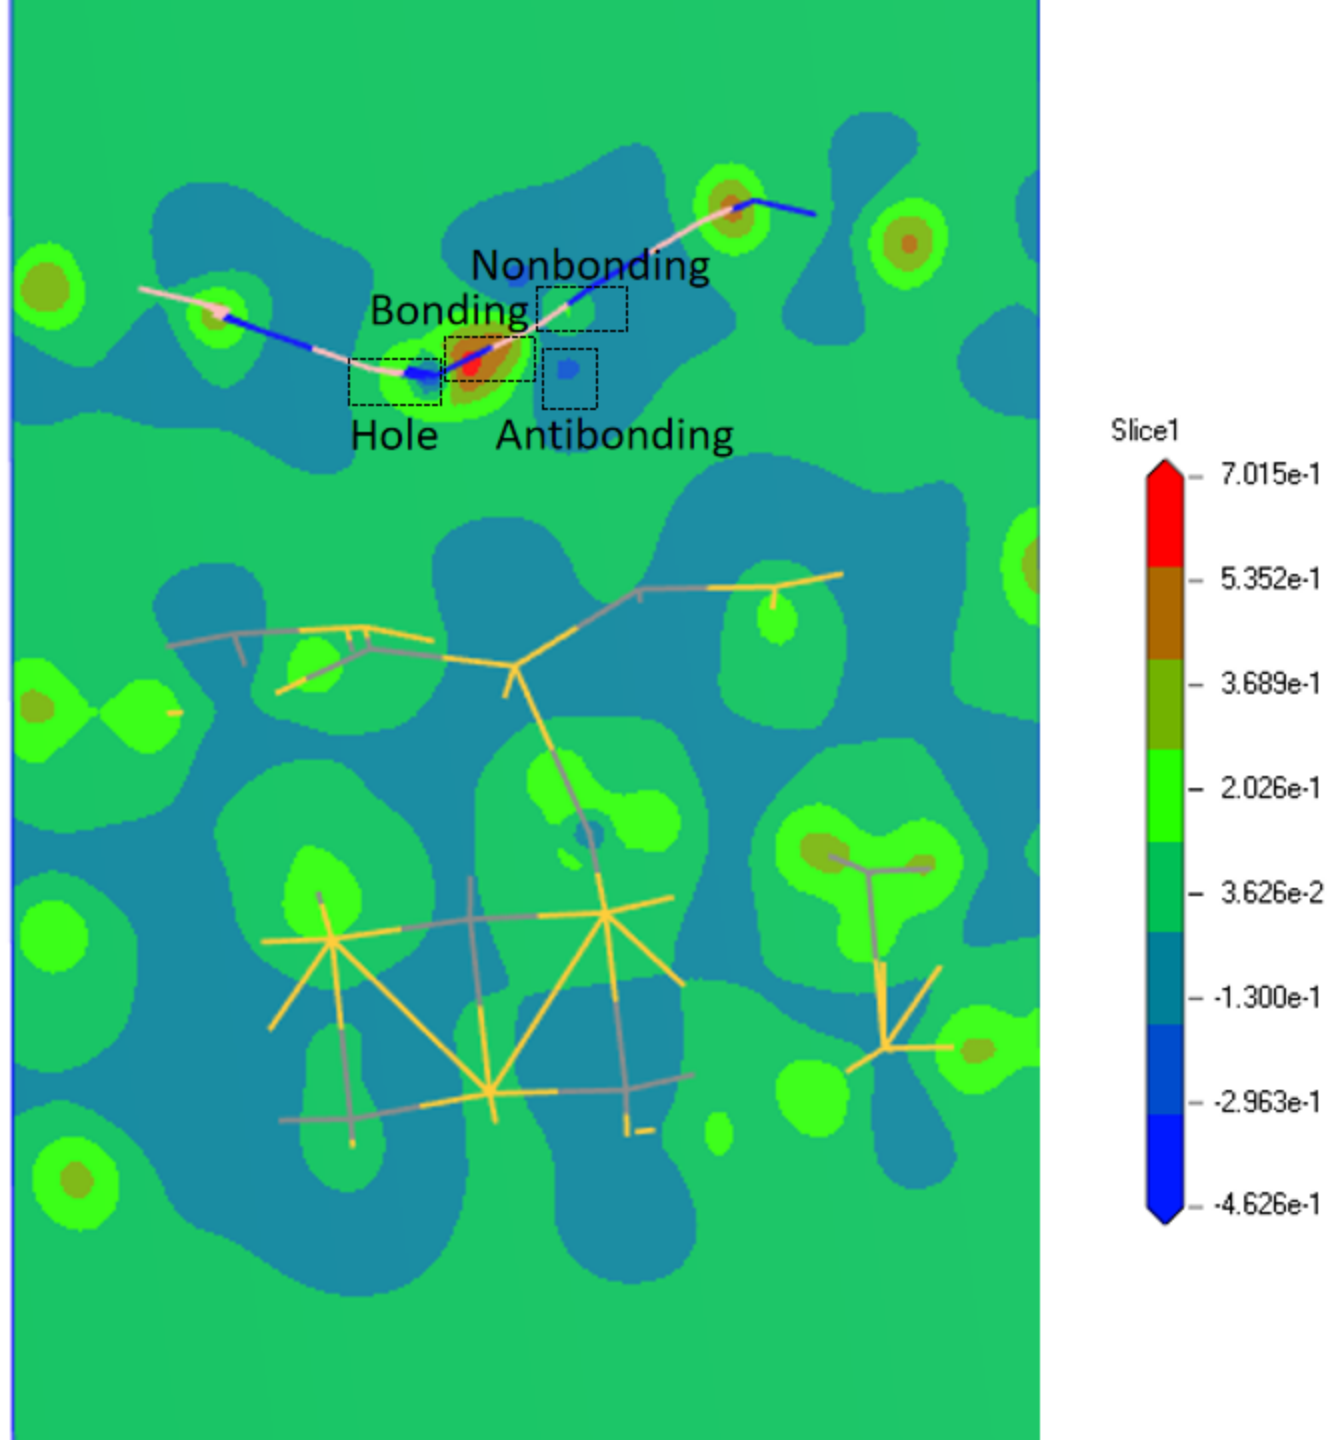

Supplement: d0ma00258e1.pdf [file d0ma00258e1.pdf]
